# Supplementary material for: Impact of High Volume Energy Drink Consumption on Electrocardiographic and Blood Pressure Parameters: A Randomized Trial
Source: PubMed Central journal article supplement — J Am Heart Assoc. 2019 May 29;8(11):e011318. doi: 10.1161/JAHA.118.011318 (PMC6585360; doi:10.1161/jaha.118.011318), 2019-05-29
Supplement: JAH3-8-e011318-s001.pdf [file JAH3-8-e011318-s001.pdf]

# **SUPPLEMENTAL MATERIAL**

**Table S1. Average Change in All Parameters at Each Time Point**

| <b>Parameter<sup>§</sup></b> | <b>Drink A</b>           | <b>Drink B</b>           | <b>Placebo</b> | <b>P value*</b> |
|------------------------------|--------------------------|--------------------------|----------------|-----------------|
| <b>QTcB, ms</b>              |                          |                          |                |                 |
| 30 mins                      | 0.1 (9.1)                | -0.1 (10.7)              | -0.1 (8.5)     | 0.99            |
| 60 mins                      | 8.4 (15.0)               | 8.8 (14.5)               | 7.9 (11.8)     | 0.93            |
| 90 mins                      | 9.0 (13.3)               | 6.3 (16.0)               | 5.4 (12.7)     | 0.32            |
| 120 mins                     | 3.5 (13.7)               | 6.4 (14.7)               | 3.0 (11.4)     | 0.33            |
| 150 mins                     | 1.0 (12.6)               | 2.7 (13.2)               | -2.4 (12.8)    | 0.06            |
| 180 mins                     | 2.7 (14.9) <sup>†</sup>  | 4.7 (18.0) <sup>‡</sup>  | -4.5 (12.3)    | <0.01           |
| 210 mins                     | 7.2 (16.1) <sup>†</sup>  | 8.2 (14.8) <sup>‡</sup>  | -2.4 (10.1)    | <0.001          |
| 240 mins                     | 10.2 (13.8) <sup>†</sup> | 8.3 (15.1) <sup>‡</sup>  | -1.1 (12.9)    | <0.001          |
| Max                          | 17.9 (13.9) <sup>†</sup> | 19.6 (15.8) <sup>‡</sup> | 11.9 (11.1)    | <0.01           |
| <b>QTcF, ms</b>              |                          |                          |                |                 |
| 30 mins                      | 1.0 (5.8)                | 1.4 (8.1)                | -0.6 (5.7)     | 0.32            |
| 60 mins                      | 5.4 (9.2)                | 6.2 (9.7)                | 2.5 (7.7)      | 0.07            |
| 90 mins                      | 3.8 (8.1)                | 3.0 (9.6)                | -0.1 (9.2)     | 0.05            |
| 120 mins                     | -0.6 (8.7)               | 1.9 (8.6)                | -1.5 (8.6)     | 0.10            |
| 150 mins                     | -1.5 (8.5)               | -0.6 (8.5)               | -4.0 (9.0)     | 0.11            |
| 180 mins                     | 2.0 (10.2) <sup>†</sup>  | 3.6 (14.0) <sup>‡</sup>  | -3.8 (9.1)     | <0.01           |
| 210 mins                     | 7.8 (13.9) <sup>†</sup>  | 8.2 (10.9) <sup>‡</sup>  | -0.7 (7.7)     | <0.001          |
| 240 mins                     | 12.3 (12.5) <sup>†</sup> | 9.7 (12.0) <sup>‡</sup>  | 1.0 (9.5)      | <0.001          |
| Max                          | 15.0 (11.8) <sup>†</sup> | 15.2 (11.9) <sup>‡</sup> | 6.9 (7.1)      | <0.001          |
| <b>QT, ms</b>                |                          |                          |                |                 |
| 30 mins                      | 2.8 (9.3)                | 4.2 (10.7) <sup>‡</sup>  | -1.4 (11.3)    | 0.03            |
| 60 mins                      | -0.5 (12.4) <sup>†</sup> | 1.0 (11.9) <sup>‡</sup>  | -7.8 (11.1)    | <0.01           |

|                 |                          |                         |              |       |
|-----------------|--------------------------|-------------------------|--------------|-------|
| 90 mins         | -5.9 (14.3)              | -3.7 (10.1)             | -10.5 (12.7) | 0.07  |
| 120 mins        | -8.6 (14.0)              | -7.0 (12.6)             | -10.5 (12.9) | 0.58  |
| 150 mins        | -6.4 (12.8)              | -7.3 (11.9)             | -7.1 (12.6)  | 0.96  |
| 180 mins        | 0.3 (13.6)               | 1.0 (15.9)              | -2.4 (13.8)  | 0.55  |
| 210 mins        | 8.9 (19.6)               | 8.0 (13.9)              | 2.5 (14.3)   | 0.15  |
| 240 mins        | 16.1 (18.3) <sup>†</sup> | 12.0 (14.0)             | 5.3 (11.5)   | <0.01 |
| Max             | 18.4 (17.0) <sup>†</sup> | 15.8 (13.3)             | 10.2 (12.2)  | 0.03  |
| <b>PR, ms</b>   |                          |                         |              |       |
| 30 mins         | 1.7 (6.4) <sup>†</sup>   | 2.2 (6.0)               | 5.1 (6.2)    | 0.03  |
| 60 mins         | 1.4 (8.8)                | 3.5 (8.3)               | 4.9 (8.0)    | 0.10  |
| 90 mins         | -2.2 (8.6) <sup>†</sup>  | -0.7 (7.6)              | 3.5 (7.3)    | <0.01 |
| 120 mins        | -2.3 (9.0)               | -2.0 (8.7)              | 0.2 (7.2)    | 0.33  |
| 150 mins        | -4.9 (9.8)               | -3.0 (7.2)              | -1.2 (6.1)   | 0.10  |
| 180 mins        | -5.0 (9.3)               | -5.2 (6.1)              | -2.7 (6.0)   | 0.24  |
| 210 mins        | -8.7 (9.7) <sup>†</sup>  | -7.9 (7.4) <sup>‡</sup> | -2.7 (6.7)   | <0.01 |
| 240 mins        | -7.0 (8.5)               | -7.7 (7.1) <sup>‡</sup> | -3.4 (6.9)   | 0.04  |
| Max             | 5.4 (6.5)                | 6.1 (7.5)               | 8.6 (6.6)    | 0.08  |
| <b>QRSd, ms</b> |                          |                         |              |       |
| 30 mins         | 3.8 (3.5)                | 3.0 (2.7)               | 3.1 (3.0)    | 0.37  |
| 60 mins         | 5.0 (3.5)                | 4.5 (3.8)               | 3.9 (3.2)    | 0.35  |
| 90 mins         | 4.0 (3.8)                | 3.0 (3.4)               | 2.8 (3.0)    | 0.16  |
| 120 mins        | 2.3 (3.0)                | 1.3 (3.6)               | 1.5 (3.5)    | 0.28  |
| 150 mins        | 0.9 (4.0)                | 1.0 (3.5)               | 0.3 (3.9)    | 0.64  |
| 180 mins        | 1.9 (3.8) <sup>†</sup>   | 0.6 (3.0)               | -0.5 (3.4)   | 0.01  |
| 210 mins        | 2.4 (3.5) <sup>†</sup>   | 1.8 (3.7) <sup>‡</sup>  | -0.3 (3.4)   | <0.01 |

|                  |                         |                         |            |        |
|------------------|-------------------------|-------------------------|------------|--------|
| 240 mins         | 2.6 (3.8) <sup>†</sup>  | 1.7 (2.8) <sup>‡</sup>  | -0.3 (2.9) | <0.01  |
| Max              | 6.2 (3.3)               | 5.9 (3.0)               | 5.0 (2.9)  | 0.16   |
| <b>HR, bpm</b>   |                         |                         |            |        |
| 30 mins          | -0.8 (4.2)              | -1.4 (4.6)              | 0.6 (4.9)  | 0.10   |
| 60 mins          | 3.0 (7.9)               | 2.3 (6.4)               | 5.2 (6.2)  | 0.07   |
| 90 mins          | 5.2 (8.4)               | 3.0 (7.1)               | 5.2 (6.3)  | 0.23   |
| 120 mins         | 4.0 (7.9)               | 4.0 (7.6)               | 4.3 (5.7)  | 0.95   |
| 150 mins         | 2.4 (6.9)               | 2.9 (6.4)               | 1.6 (5.8)  | 0.63   |
| 180 mins         | 0.6 (7.2)               | 0.8 (6.7)               | -0.5 (5.6) | 0.62   |
| 210 mins         | -0.6 (7.4)              | 0.1 (6.8)               | -1.3 (5.3) | 0.60   |
| 240 mins         | -1.9 (6.5)              | -1.4 (5.5)              | -1.8 (5.2) | 0.92   |
| Max              | 7.7 (7.4)               | 7.2 (6.8)               | 7.4 (5.9)  | 0.92   |
| <b>SBP, mmHg</b> |                         |                         |            |        |
| 30 mins          | 9.5 (5.0) <sup>†</sup>  | 8.0 (4.6) <sup>‡</sup>  | 5.0 (5.0)  | <0.01  |
| 60 mins          | 13.5 (5.5) <sup>†</sup> | 11.5 (5.5) <sup>‡</sup> | 7.3 (6.2)  | <0.001 |
| 90 mins          | 11.1 (6.7) <sup>†</sup> | 9.7 (6.5) <sup>‡</sup>  | 4.7 (5.4)  | <0.001 |
| 120 mins         | 10.7 (5.5) <sup>†</sup> | 8.0 (6.0) <sup>‡</sup>  | 3.5 (5.0)  | <0.001 |
| 150 mins         | 7.2 (4.0) <sup>†</sup>  | 7.7 (5.5) <sup>‡</sup>  | 1.5 (4.8)  | <0.001 |
| 180 mins         | 6.8 (5.5) <sup>†</sup>  | 7.5 (5.1) <sup>‡</sup>  | 1.5 (5.5)  | <0.001 |
| 210 mins         | 6.8 (5.1) <sup>†</sup>  | 5.9 (5.2) <sup>‡</sup>  | 2.5 (5.1)  | <0.001 |
| 240 mins         | 9.0 (4.6) <sup>†</sup>  | 7.8 (5.4) <sup>‡</sup>  | 4.2 (4.5)  | <0.001 |
| Max              | 15.9 (5.0) <sup>†</sup> | 14.4 (4.8) <sup>‡</sup> | 9.8 (4.8)  | <0.001 |
| <b>DBP, mmHg</b> |                         |                         |            |        |
| 30 mins          | 4.5 (4.7) <sup>†</sup>  | 4.5 (4.4) <sup>‡</sup>  | 1.7 (4.2)  | 0.01   |
| 60 mins          | 6.9 (4.2) <sup>†</sup>  | 6.8 (5.3) <sup>‡</sup>  | 2.8 (3.9)  | <0.001 |

|                   |                         |                         |            |        |
|-------------------|-------------------------|-------------------------|------------|--------|
| 90 mins           | 6.4 (4.6) <sup>†</sup>  | 5.5 (4.6) <sup>‡</sup>  | 2.2 (4.2)  | <0.001 |
| 120 mins          | 5.8 (4.3) <sup>†</sup>  | 5.2 (3.9) <sup>‡</sup>  | 1.2 (3.1)  | <0.001 |
| 150 mins          | 5.5 (4.5) <sup>†</sup>  | 6.1 (5.1) <sup>‡</sup>  | 1.1 (4.0)  | <0.001 |
| 180 mins          | 4.6 (5.9) <sup>†</sup>  | 4.3 (6.1) <sup>‡</sup>  | 0.8 (3.8)  | <0.001 |
| 210 mins          | 1.4 (5.1)               | 2.7 (5.2)               | 1.1 (3.9)  | 0.28   |
| 240 mins          | 3.0 (4.6)               | 3.3 (5.3)               | 2.4 (4.6)  | 0.69   |
| Max               | 9.6 (4.1) <sup>†</sup>  | 9.6 (4.9) <sup>‡</sup>  | 6.1 (3.8)  | <0.001 |
| <b>cSBP, mmHg</b> |                         |                         |            |        |
| 30 mins           | 6.6 (5.2) <sup>†</sup>  | 5.7 (4.9) <sup>‡</sup>  | 2.8 (4.2)  | <0.01  |
| 60 mins           | 8.9 (5.2) <sup>†</sup>  | 7.4 (5.6) <sup>‡</sup>  | 3.2 (4.6)  | <0.001 |
| 90 mins           | 6.8 (5.9) <sup>†</sup>  | 5.5 (5.5) <sup>‡</sup>  | 1.7 (5.2)  | <0.001 |
| 120 mins          | 6.4 (5.1) <sup>†</sup>  | 4.6 (5.3) <sup>‡</sup>  | 0.7 (3.9)  | <0.001 |
| 150 mins          | 4.6 (3.8) <sup>†</sup>  | 4.7 (5.3) <sup>‡</sup>  | -0.5 (4.5) | <0.001 |
| 180 mins          | 4.0 (4.8) <sup>†</sup>  | 4.6 (5.3) <sup>‡</sup>  | -0.6 (4.7) | <0.001 |
| 210 mins          | 2.9 (4.5)               | 3.3 (5.2) <sup>‡</sup>  | 0.6 (4.8)  | 0.02   |
| 240 mins          | 4.9 (4.6) <sup>†</sup>  | 4.1 (5.0)               | 1.9 (4.7)  | 0.02   |
| Max               | 11.1 (4.7) <sup>†</sup> | 10.1 (4.8) <sup>‡</sup> | 6.5 (3.5)  | <0.001 |
| <b>cDBP, mmHg</b> |                         |                         |            |        |
| 30 mins           | 4.6 (4.6) <sup>†</sup>  | 4.5 (4.7)               | 2.1 (4.2)  | 0.03   |
| 60 mins           | 7.6 (4.3) <sup>†</sup>  | 6.9 (5.3) <sup>‡</sup>  | 3.4 (3.8)  | <0.001 |
| 90 mins           | 7.0 (5.1) <sup>†</sup>  | 6.0 (4.9) <sup>‡</sup>  | 2.9 (4.2)  | <0.001 |
| 120 mins          | 6.3 (4.6) <sup>†</sup>  | 5.8 (4.1) <sup>‡</sup>  | 2.0 (3.2)  | <0.001 |
| 150 mins          | 5.5 (4.4) <sup>†</sup>  | 6.2 (5.3) <sup>‡</sup>  | 1.6 (4.1)  | <0.001 |

|          |                        |                        |           |        |
|----------|------------------------|------------------------|-----------|--------|
| 180 mins | 4.6 (6.0) <sup>†</sup> | 4.1 (6.4) <sup>‡</sup> | 1.2 (3.7) | <0.01  |
| 210 mins | 1.5 (5.2)              | 2.7 (5.2)              | 1.3 (4.0) | 0.34   |
| 240 mins | 3.0 (4.5)              | 3.3 (5.3)              | 2.6 (4.5) | 0.81   |
| Max      | 9.9 (4.2) <sup>†</sup> | 9.8 (5.1) <sup>‡</sup> | 6.7 (3.5) | <0.001 |

All data reported as mean (standard deviation). cDBP, central diastolic blood pressure; DBP, diastolic blood pressure; cSBP, central systolic blood pressure; HR, heart rate; PR, PR interval; QRSd, QRS duration; QT, QT interval; QTcB indicates Bazett's corrected QT interval; QTcF, Fridericia's corrected QT interval; SBP, systolic blood pressure.

\* $P < 0.05$  for analysis of variance adjusted for subject variability

<sup>†</sup>Statistically significant difference between Drink A and Placebo

<sup>‡</sup>Statistically significant difference between Drink B and Placebo

<sup>§</sup>No statistically significant difference was noted between Drink A and Drink B for any parameter
